# Supplementary material for: A Novel Anti-CD44 Variant 10 Monoclonal Antibody is Useful for Immunohistochemical Analysis against Oral Squamous cell carcinomas
Source: Preprints.org preprint supplement (doi:10.20944/preprints202305.1905.v1), 2023-05-26
Supplement: Supplementary file 1 [file supplementary]

**Supplementary Table S2.** Immunohistochemical analysis using C44Mab-18 against OSCC tissue array.

| No. | Age | Sex | Organ  /Anatomic Site | Pathology diagnosis | TNM | C44Mab-18 | C44Mab-46 |
| --- | --- | --- | --- | --- | --- | --- | --- |
| 1 | 78 | M | Tongue | SCC of tongue | T2N0M0 | + | + |
| 2 | 40 | M | Tongue | SCC of tongue | T2N0M0 | + | ++ |
| 3 | 75 | F | Tongue | SCC of tongue | T2N0M0 | - | + |
| 4 | 35 | F | Tongue | SCC of tongue | T2N0M0 | ++ | ++ |
| 5 | 61 | M | Tongue | SCC of tongue | T2N0M0 | ++ | +++ |
| 6 | 41 | F | Tongue | SCC of tongue | T2N0M0 | + | + |
| 7 | 64 | M | Tongue | SCC of right tongue | T2N2M0 | ++ | ++ |
| 8 | 76 | M | Tongue | SCC of tongue | T1N0M0 | ++ | ++ |
| 9 | 50 | F | Tongue | SCC of tongue | T2N0M0 | ++ | ++ |
| 10 | 44 | M | Tongue | SCC of tongue | T2N1M0 | ++ | +++ |
| 11 | 53 | F | Tongue | SCC of tongue | T1N0M0 | + | ++ |
| 12 | 46 | F | Tongue | SCC of tongue | T2N0M0 | ++ | + |
| 13 | 50 | M | Tongue | SCC of root of tongue | T3N1M0 | ++ | + |
| 14 | 36 | F | Tongue | SCC of tongue | T1N0M0 | ++ | +++ |
| 15 | 63 | F | Tongue | SCC of tongue | T1N0M0 | + | + |
| 16 | 46 | M | Tongue | SCC of tongue | T2N0M0 | + | - |
| 17 | 58 | M | Tongue | SCC of tongue | T2N0M0 | + | + |
| 18 | 64 | M | Lip | SCC of lower lip | T1N0M0 | + | +++ |
| 19 | 57 | M | Lip | SCC of lower lip | T2N0M0 | + | +++ |
| 20 | 61 | M | Lip | SCC of lower lip | T1N0M0 | + | ++ |
| 21 | 60 | M | Gum | SCC of gum | T3N0M0 | ++ | + |
| 22 | 60 | M | Gum | SCC of gum | T1N0M0 | +++ | +++ |
| 23 | 69 | M | Gum | SCC of upper gum | T3N0M0 | ++ | ++ |
| 24 | 53 | M | Bucca cavioris | SCC of bucca cavioris | T2N0M0 | ++ | + |
| 25 | 55 | M | Bucca cavioris | SCC of bucca cavioris | T1N0M0 | +++ | + |
| 26 | 58 | M | Tongue | SCC of base of tongue | T1N0M0 | ++ | ++ |
| 27 | 63 | M | Oral cavity | SCC | T1N0M0 | +++ | ++ |
| 28 | 48 | F | Tongue | SCC of tongue | T1N0M0 | + | + |
| 29 | 80 | M | Lip | SCC of lower lip | T1N0M0 | +++ | +++ |
| 30 | 77 | M | Tongue | SCC of base of tongue | T2N0M0 | ++ | ++ |
| 31 | 59 | M | Tongue | SCC of tongue | T2N0M0 | + | - |
| 32 | 77 | F | Tongue | SCC of tongue | T1N0M0 | + | ++ |
| 33 | 56 | M | Tongue | SCC of root of tongue | T2N1M0 | + | + |
| 34 | 60 | M | Tongue | SCC of tongue | T2N1M0 | ++ | ++ |
| 35 | 62 | M | Tongue | SCC of tongue | T2N0M0 | + | ++ |
| 36 | 67 | F | Tongue | SCC of tongue | T2N0M0 | - | ++ |
| 37 | 47 | F | Tongue | SCC of tongue | T2N0M0 | +++ | +++ |
| 38 | 37 | M | Tongue | SCC of tongue | T2N1M0 | - | - |
| 39 | 55 | F | Tongue | SCC of tongue | T2N0M0 | + | + |
| 40 | 56 | F | Bucca cavioris | SCC of bucca cavioris | T2N0M0 | + | + |
| 41 | 49 | M | Bucca cavioris | SCC of bucca cavioris | T1N0M0 | - | - |
| 42 | 45 | M | Bucca cavioris | SCC of bucca cavioris | T2N0M0 | - | - |
| 43 | 42 | M | Bucca cavioris | SCC of bucca cavioris | T3N0M0 | +++ | ++ |
| 44 | 44 | M | Jaw | SCC of right drop jaw | T1N0M0 | + | +++ |
| 45 | 40 | F | Tongue | SCC of base of tongue | T2N0M0 | - | ++ |
| 46 | 49 | M | Bucca cavioris | SCC of bucca cavioris | T1N0M0 | ++ | +++ |
| 47 | 56 | F | Tongue | SCC of base of tongue | T2N0M0 | - | + |
| 48 | 42 | M | Bucca cavioris | SCC a of bucca cavioris | T3N0M0 | +++ | +++ |
| 49 | 87 | F | Face | SCC a of left face | T2N0M0 | - | + |
| 50 | 50 | M | Gum | SCC of gum | T2N0M0 | - | - |

-, No stain; +, Weak intensity; ++, Moderate intensity; +++, Strong intensity.
